# Supplementary material for: Using genomic epidemiology of SARS-CoV-2 to support contact tracing and public health surveillance in rural Humboldt County, California
Source: Springer Nature journal article supplement (doi:10.1186/s12889-022-12790-0), 2022-03-07
Supplement: MOESM1 [file 20198354]

Supplementary Information for “Using genomic epidemiology of SARS-CoV-2 to support contact tracing and public health surveillance in rural Humboldt County, California.”

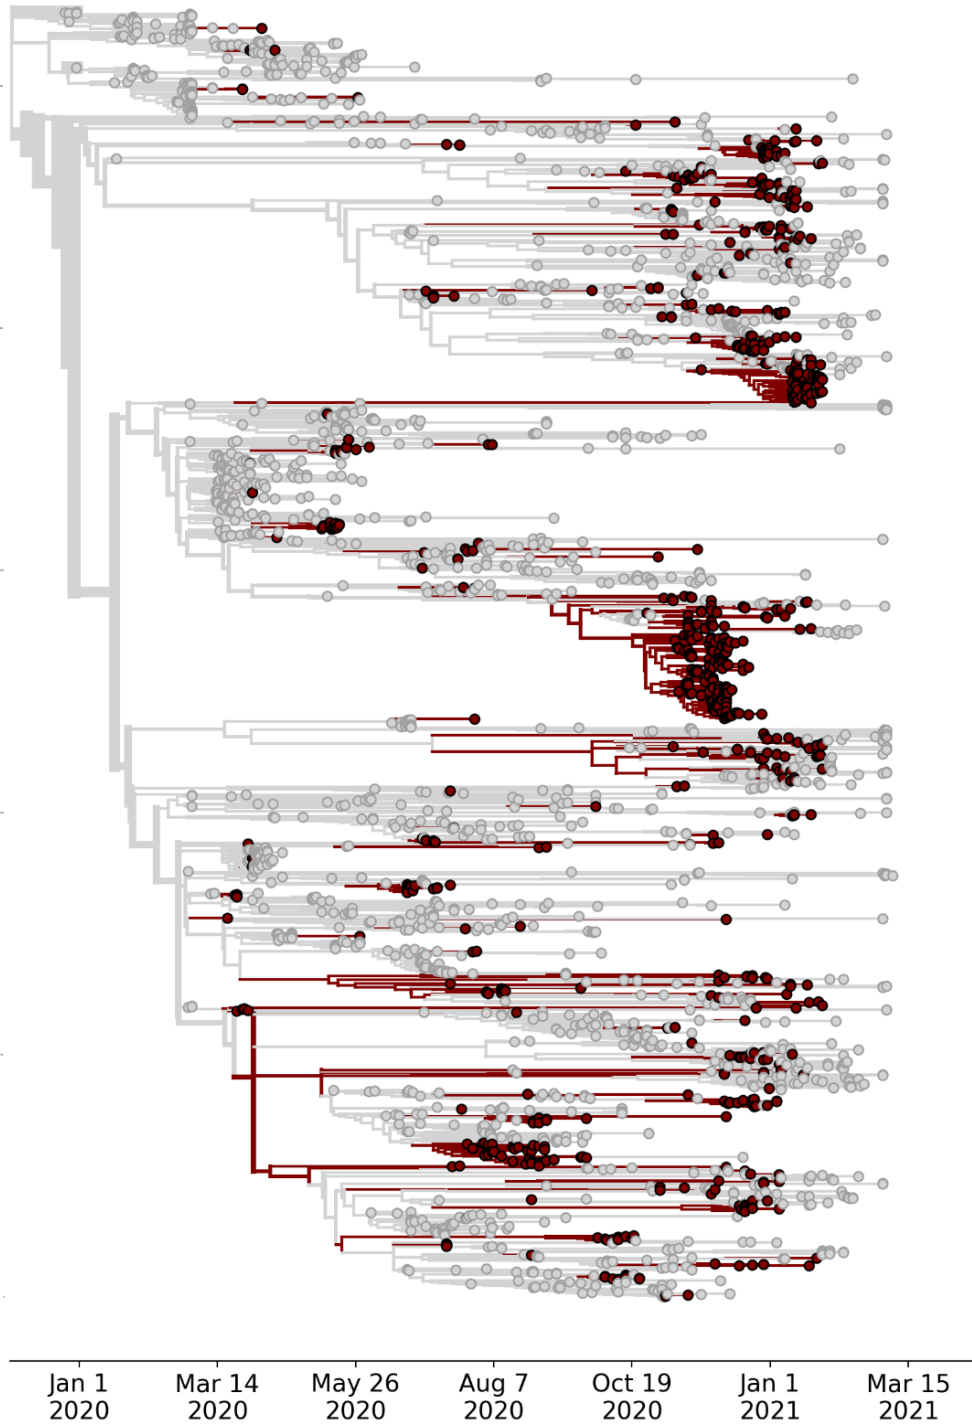

Supplemental Figure 1: Temporally-resolved phylogenetic tree of 2653 SARS-CoV-2 genomes, 853 of which were sampled from Humboldt County. Tips sampled from Humboldt County are indicated in maroon and tips sampled from other locations are colored in grey. Branches colored in maroon indicate inferred circulation within Humboldt County, and branches in grey indicate inferred transmission outside of Humboldt County.

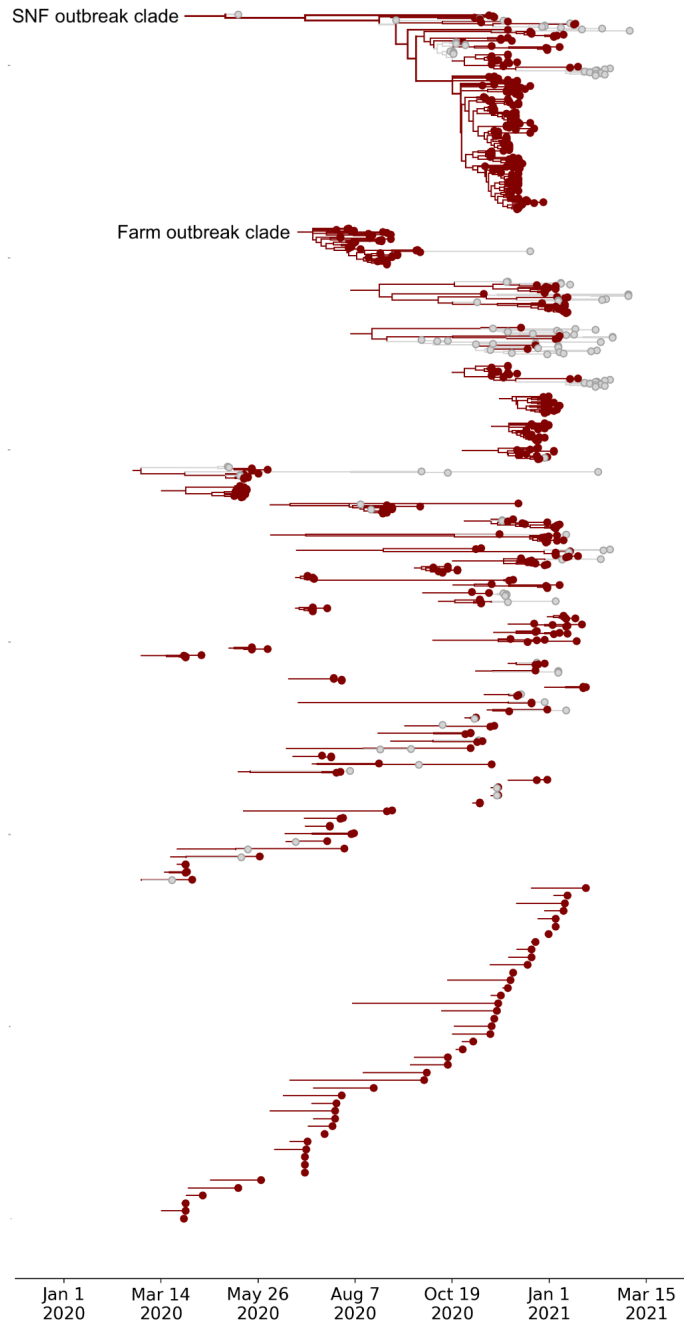

Supplemental Figure 2: Phylogenetic clades for 100 discrete lineages of SARS-CoV-2 introduced to Humboldt County. This visualization is derived from the phylogenetic tree in Supplemental Figure 1; in this figure we have simply taken away portions of the tree that circulated outside of Humboldt County. Here, each clade represents a unique introduction of SARS-CoV-2 to the county, and the length of the maroon branches indicate transmission duration within Humboldt County. Grey tips and branches represent viruses that descend from diversity that accrued while a clade was circulating in Humboldt County, but that were sampled outside of Humboldt County. Most introductions lead to limited transmission within Humboldt County, as evidenced by minimal genetic diversity of a clade sampled within the county. Clades associated with the farm outbreak and the SNF outbreak are annotated.

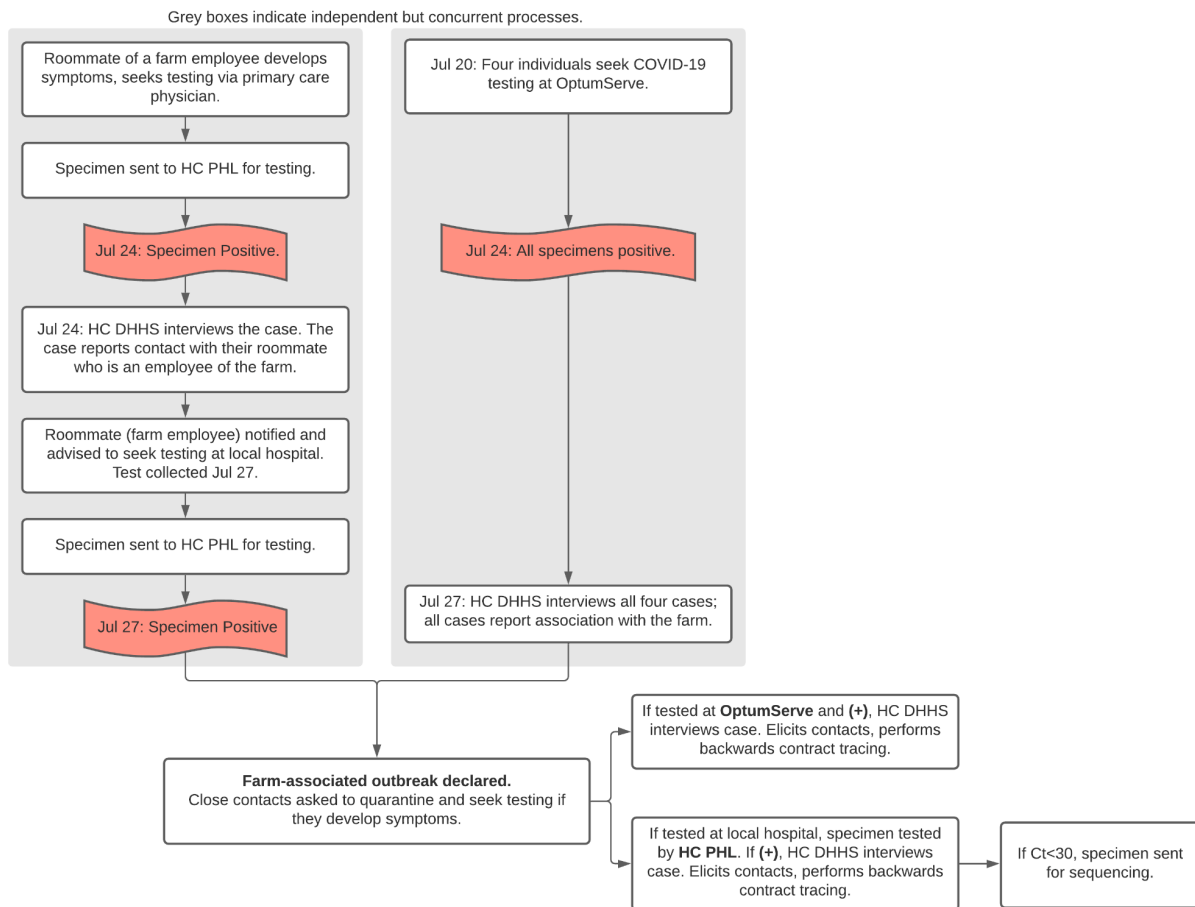

Supplemental Figure 3: Flowchart explaining how case interview data and sequence data were collected during the outbreak at a commercial farm in Humboldt County. The flowchart begins with the first confirmed positive case, and goes through actions taken and recommendations given by communicable disease investigators with the Humboldt County Department of Health and Human Services (HC DHHS) or by the Humboldt County Public Health Laboratory (HC PHL). The two grey boxes indicate independent processes that were co-occurring at the start of this outbreak.

Supplemental Table 1: Sequence data accession numbers. All sequences were submitted to GISAID as they were generated, and accession numbers are given. At the end of the study sequences were also deposited into NCBI GenBank. Some sequences accepted by GISAID were rejected by NCBI. In these cases, the GenBank accession number is given as “NA”.

| <b>Sample_ID</b>      | <b>GISAID_accession</b> | <b>GenBank_accession</b> |
|-----------------------|-------------------------|--------------------------|
| USA/CA-CZB-10785/2020 | EPI_ISL_583046          | MW276323                 |
| USA/CA-CZB-10786/2020 | EPI_ISL_583047          | MW276324                 |
| USA/CA-CZB-10788/2020 | EPI_ISL_583048          | MW276325                 |
| USA/CA-CZB-10789/2020 | EPI_ISL_583049          | MW276326                 |
| USA/CA-CZB-10790/2020 | EPI_ISL_583050          | MW276327                 |
| USA/CA-CZB-10791/2020 | EPI_ISL_583051          | MW276328                 |
| USA/CA-CZB-10792/2020 | EPI_ISL_583052          | MW276329                 |
| USA/CA-CZB-10793/2020 | EPI_ISL_583053          | MW276330                 |
| USA/CA-CZB-10794/2020 | EPI_ISL_583054          | MW276331                 |
| USA/CA-CZB-10795/2020 | EPI_ISL_583055          | MW276332                 |
| USA/CA-CZB-10796/2020 | EPI_ISL_583056          | MW276333                 |
| USA/CA-CZB-10797/2020 | EPI_ISL_583057          | MW276334                 |
| USA/CA-CZB-10798/2020 | EPI_ISL_583058          | MW276335                 |
| USA/CA-CZB-10799/2020 | EPI_ISL_2659414         | MZ842558                 |
| USA/CA-CZB-10800/2020 | EPI_ISL_2659492         | MZ842557                 |
| USA/CA-CZB-10801/2020 | EPI_ISL_583059          | MW276336                 |
| USA/CA-CZB-10802/2020 | EPI_ISL_583060          | MW276337                 |
| USA/CA-CZB-10803/2020 | EPI_ISL_2659500         | MZ842556                 |
| USA/CA-CZB-10804/2020 | EPI_ISL_583061          | MW276338                 |
| USA/CA-CZB-10805/2020 | EPI_ISL_2659209         | MZ842555                 |
| USA/CA-CZB-10808/2020 | EPI_ISL_2659371         | MZ842554                 |
| USA/CA-CZB-10809/2020 | EPI_ISL_583062          | MW276339                 |
| USA/CA-CZB-10810/2020 | EPI_ISL_583063          | MW276340                 |
| USA/CA-CZB-10811/2020 | EPI_ISL_583064          | MW276341                 |
| USA/CA-CZB-10812/2020 | EPI_ISL_583065          | MW276342                 |

|                       |                 |          |
|-----------------------|-----------------|----------|
| USA/CA-CZB-10813/2020 | EPI_ISL_583066  | MW276343 |
| USA/CA-CZB-10815/2020 | EPI_ISL_583067  | MW276344 |
| USA/CA-CZB-10817/2020 | EPI_ISL_2659405 | MZ842553 |
| USA/CA-CZB-10818/2020 | EPI_ISL_583068  | MW276345 |
| USA/CA-CZB-10819/2020 | EPI_ISL_583069  | MW276346 |
| USA/CA-CZB-10820/2020 | EPI_ISL_583070  | MW276347 |
| USA/CA-CZB-10821/2020 | EPI_ISL_583071  | MW276348 |
| USA/CA-CZB-10822/2020 | EPI_ISL_583072  | MW276349 |
| USA/CA-CZB-10823/2020 | EPI_ISL_583073  | MW276350 |
| USA/CA-CZB-10824/2020 | EPI_ISL_583074  | MW276351 |
| USA/CA-CZB-10825/2020 | EPI_ISL_583075  | MW276352 |
| USA/CA-CZB-10826/2020 | EPI_ISL_583076  | MW276353 |
| USA/CA-CZB-10827/2020 | EPI_ISL_583077  | MW276354 |
| USA/CA-CZB-10828/2020 | EPI_ISL_583078  | MW276355 |
| USA/CA-CZB-10829/2020 | EPI_ISL_2758407 | MZ842552 |
| USA/CA-CZB-10830/2020 | EPI_ISL_583079  | MW276356 |
| USA/CA-CZB-10831/2020 | EPI_ISL_2659486 | MZ842551 |
| USA/CA-CZB-10832/2020 | EPI_ISL_583080  | MW276357 |
| USA/CA-CZB-10833/2020 | EPI_ISL_2659487 | MZ842550 |
| USA/CA-CZB-10834/2020 | EPI_ISL_583081  | MW276358 |
| USA/CA-CZB-10835/2020 | EPI_ISL_583082  | MW276359 |
| USA/CA-CZB-10836/2020 | EPI_ISL_583083  | MW276360 |
| USA/CA-CZB-10837/2020 | EPI_ISL_583084  | MW276361 |
| USA/CA-CZB-10838/2020 | EPI_ISL_2758408 | MZ842549 |
| USA/CA-CZB-10839/2020 | EPI_ISL_583085  | MW276362 |
| USA/CA-CZB-10841/2020 | EPI_ISL_583086  | MW276363 |
| USA/CA-CZB-10842/2020 | EPI_ISL_583087  | MW276364 |
| USA/CA-CZB-10843/2020 | EPI_ISL_583088  | MW276365 |
| USA/CA-CZB-10844/2020 | EPI_ISL_583089  | MW276366 |

|                       |                 |          |
|-----------------------|-----------------|----------|
| USA/CA-CZB-10845/2020 | EPI_ISL_583090  | MZ842548 |
| USA/CA-CZB-10846/2020 | EPI_ISL_583091  | MW276367 |
| USA/CA-CZB-10847/2020 | EPI_ISL_583092  | MW276368 |
| USA/CA-CZB-10848/2020 | EPI_ISL_583093  | MW276369 |
| USA/CA-CZB-10849/2020 | EPI_ISL_583094  | MW276370 |
| USA/CA-CZB-10850/2020 | EPI_ISL_583095  | MW276371 |
| USA/CA-CZB-10851/2020 | EPI_ISL_583096  | MW276372 |
| USA/CA-CZB-10852/2020 | EPI_ISL_583097  | MW276373 |
| USA/CA-CZB-10854/2020 | EPI_ISL_583098  | MW276374 |
| USA/CA-CZB-10855/2020 | EPI_ISL_583099  | MW276375 |
| USA/CA-CZB-10856/2020 | EPI_ISL_583100  | MW276376 |
| USA/CA-CZB-10858/2020 | EPI_ISL_583101  | MZ842547 |
| USA/CA-CZB-10860/2020 | EPI_ISL_583102  | MW276377 |
| USA/CA-CZB-10861/2020 | EPI_ISL_583103  | MW276378 |
| USA/CA-CZB-10862/2020 | EPI_ISL_583104  | MW276379 |
| USA/CA-CZB-10863/2020 | EPI_ISL_583105  | MW276380 |
| USA/CA-CZB-10864/2020 | EPI_ISL_2758409 | NA       |
| USA/CA-CZB-10865/2020 | EPI_ISL_583106  | MW276381 |
| USA/CA-CZB-10866/2020 | EPI_ISL_583107  | MW276382 |
| USA/CA-CZB-10867/2020 | EPI_ISL_583108  | MW276383 |
| USA/CA-CZB-10868/2020 | EPI_ISL_583109  | MW276384 |
| USA/CA-CZB-10870/2020 | EPI_ISL_583110  | MW276385 |
| USA/CA-CZB-10871/2020 | EPI_ISL_583111  | MW276386 |
| USA/CA-CZB-10872/2020 | EPI_ISL_583112  | MW276387 |
| USA/CA-CZB-10873/2020 | EPI_ISL_583113  | MW276388 |
| USA/CA-CZB-10874/2020 | EPI_ISL_583114  | MW276389 |
| USA/CA-CZB-10876/2020 | EPI_ISL_583115  | MW276390 |
| USA/CA-CZB-10878/2020 | EPI_ISL_583116  | MW276391 |
| USA/CA-CZB-10879/2020 | EPI_ISL_583117  | MW276392 |

|                       |                 |          |
|-----------------------|-----------------|----------|
| USA/CA-CZB-10880/2020 | EPI_ISL_583118  | MW276393 |
| USA/CA-CZB-10881/2020 | EPI_ISL_583119  | MW276394 |
| USA/CA-CZB-10885/2020 | EPI_ISL_583120  | MW276395 |
| USA/CA-CZB-10887/2020 | EPI_ISL_583121  | MW276396 |
| USA/CA-CZB-10889/2020 | EPI_ISL_583122  | MW276397 |
| USA/CA-CZB-10891/2020 | EPI_ISL_583123  | MW276398 |
| USA/CA-CZB-10892/2020 | EPI_ISL_583124  | MW276399 |
| USA/CA-CZB-10893/2020 | EPI_ISL_2658689 | NA       |
| USA/CA-CZB-10895/2020 | EPI_ISL_583125  | MW276400 |
| USA/CA-CZB-10896/2020 | EPI_ISL_583126  | MW276401 |
| USA/CA-CZB-10897/2020 | EPI_ISL_583127  | MW276402 |
| USA/CA-CZB-10898/2020 | EPI_ISL_583128  | MW276403 |
| USA/CA-CZB-10899/2020 | EPI_ISL_583129  | MW276404 |
| USA/CA-CZB-10901/2020 | EPI_ISL_583130  | MW276405 |
| USA/CA-CZB-10902/2020 | EPI_ISL_583131  | MW276406 |
| USA/CA-CZB-10903/2020 | EPI_ISL_583132  | MW276407 |
| USA/CA-CZB-10904/2020 | EPI_ISL_583133  | MW276408 |
| USA/CA-CZB-10905/2020 | EPI_ISL_583134  | MW276409 |
| USA/CA-CZB-10906/2020 | EPI_ISL_583135  | MW276410 |
| USA/CA-CZB-10907/2020 | EPI_ISL_583136  | MW276411 |
| USA/CA-CZB-10908/2020 | EPI_ISL_583137  | MW276412 |
| USA/CA-CZB-10909/2020 | EPI_ISL_583138  | MW276413 |
| USA/CA-CZB-10910/2020 | EPI_ISL_583139  | MW276414 |
| USA/CA-CZB-10911/2020 | EPI_ISL_583140  | MW276415 |
| USA/CA-CZB-10912/2020 | EPI_ISL_583141  | MW276416 |
| USA/CA-CZB-10913/2020 | EPI_ISL_583142  | MW276417 |
| USA/CA-CZB-10914/2020 | EPI_ISL_583143  | MW276418 |
| USA/CA-CZB-10915/2020 | EPI_ISL_583144  | MW276419 |
| USA/CA-CZB-10916/2020 | EPI_ISL_583145  | MW276420 |



|                       |                |          |
|-----------------------|----------------|----------|
| USA/CA-CZB-10917/2020 | EPI_ISL_583146 | MW276421 |
| USA/CA-CZB-10918/2020 | EPI_ISL_583147 | MW276422 |
| USA/CA-CZB-10919/2020 | EPI_ISL_583148 | MW276423 |
| USA/CA-CZB-10920/2020 | EPI_ISL_583149 | MW276424 |
| USA/CA-CZB-10921/2020 | EPI_ISL_583150 | MW276425 |
| USA/CA-CZB-10922/2020 | EPI_ISL_583151 | MW276426 |
| USA/CA-CZB-10923/2020 | EPI_ISL_583152 | MW276427 |
| USA/CA-CZB-10924/2020 | EPI_ISL_583153 | MW276428 |
| USA/CA-CZB-10925/2020 | EPI_ISL_583154 | MW276429 |
| USA/CA-CZB-10926/2020 | EPI_ISL_583155 | MW276430 |
| USA/CA-CZB-10927/2020 | EPI_ISL_583156 | MW276431 |
| USA/CA-CZB-10928/2020 | EPI_ISL_583157 | MW276432 |
| USA/CA-CZB-10929/2020 | EPI_ISL_583158 | MW276433 |
| USA/CA-CZB-10930/2020 | EPI_ISL_583159 | MW276434 |
| USA/CA-CZB-10931/2020 | EPI_ISL_583160 | MW276435 |
| USA/CA-CZB-10932/2020 | EPI_ISL_583161 | MW276436 |
| USA/CA-CZB-10933/2020 | EPI_ISL_583162 | MW276437 |
| USA/CA-CZB-10934/2020 | EPI_ISL_583163 | MW276438 |
| USA/CA-CZB-10935/2020 | EPI_ISL_583164 | MW276439 |
| USA/CA-CZB-10936/2020 | EPI_ISL_583165 | MW276440 |
| USA/CA-CZB-10937/2020 | EPI_ISL_583166 | MW276441 |
| USA/CA-CZB-10938/2020 | EPI_ISL_583167 | MW276442 |
| USA/CA-CZB-10939/2020 | EPI_ISL_583168 | MW276443 |
| USA/CA-CZB-10940/2020 | EPI_ISL_583169 | MW276444 |
| USA/CA-CZB-10941/2020 | EPI_ISL_583170 | MW276445 |
| USA/CA-CZB-1278/2020  | EPI_ISL_454636 | MT533233 |
| USA/CA-CZB-1279/2020  | EPI_ISL_454637 | MT533234 |
| USA/CA-CZB-1280/2020  | EPI_ISL_454638 | MT533235 |
| USA/CA-CZB-1281/2020  | EPI_ISL_454639 | MT533236 |

|                       |                 |          |
|-----------------------|-----------------|----------|
| USA/CA-CZB-1282/2020  | EPI_ISL_454640  | MT533237 |
| USA/CA-CZB-1283/2020  | EPI_ISL_454641  | MT533238 |
| USA/CA-CZB-14715/2020 | EPI_ISL_738785  | NA       |
| USA/CA-CZB-14716/2020 | EPI_ISL_738778  | MW565247 |
| USA/CA-CZB-14717/2020 | EPI_ISL_739011  | MW565246 |
| USA/CA-CZB-14718/2020 | EPI_ISL_2658704 | NA       |
| USA/CA-CZB-14721/2020 | EPI_ISL_739489  | MW565245 |
| USA/CA-CZB-14722/2020 | EPI_ISL_739264  | NA       |
| USA/CA-CZB-14724/2020 | EPI_ISL_739086  | MW565244 |
| USA/CA-CZB-14725/2020 | EPI_ISL_2659408 | MZ842401 |
| USA/CA-CZB-14727/2020 | EPI_ISL_739297  | MW565243 |
| USA/CA-CZB-14728/2020 | EPI_ISL_2659346 | MZ842400 |
| USA/CA-CZB-14729/2020 | EPI_ISL_739571  | MW565242 |
| USA/CA-CZB-14730/2020 | EPI_ISL_739366  | MW565241 |
| USA/CA-CZB-14731/2020 | EPI_ISL_2659403 | MZ842399 |
| USA/CA-CZB-14733/2020 | EPI_ISL_2659591 | MZ842398 |
| USA/CA-CZB-14734/2020 | EPI_ISL_738988  | MW565240 |
| USA/CA-CZB-14735/2020 | EPI_ISL_2659461 | MZ842397 |
| USA/CA-CZB-14736/2020 | EPI_ISL_739311  | MW565239 |
| USA/CA-CZB-14737/2020 | EPI_ISL_739533  | MW565238 |
| USA/CA-CZB-14739/2020 | EPI_ISL_2659260 | MZ842396 |
| USA/CA-CZB-14740/2020 | EPI_ISL_2659385 | MZ842395 |
| USA/CA-CZB-14741/2020 | EPI_ISL_739177  | MW565237 |
| USA/CA-CZB-14742/2020 | EPI_ISL_738961  | MW565236 |
| USA/CA-CZB-14743/2020 | EPI_ISL_739558  | MW565235 |
| USA/CA-CZB-14744/2020 | EPI_ISL_2659205 | MZ842394 |
| USA/CA-CZB-14745/2020 | EPI_ISL_738530  | MW565234 |
| USA/CA-CZB-14746/2020 | EPI_ISL_2659549 | MZ842393 |
| USA/CA-CZB-14747/2020 | EPI_ISL_2659638 | MZ842392 |

|                       |                |          |
|-----------------------|----------------|----------|
| USA/CA-CZB-14748/2020 | EPI_ISL_738879 | MW565233 |
| USA/CA-CZB-14749/2020 | EPI_ISL_738756 | MW565232 |
| USA/CA-CZB-14750/2020 | EPI_ISL_739225 | MW565231 |
| USA/CA-CZB-14751/2020 | EPI_ISL_738951 | MW565230 |
| USA/CA-CZB-14752/2020 | EPI_ISL_739148 | MW565229 |
| USA/CA-CZB-14754/2020 | EPI_ISL_738947 | MW565227 |
| USA/CA-CZB-14755/2020 | EPI_ISL_739433 | MW565226 |
| USA/CA-CZB-14756/2020 | EPI_ISL_739530 | MW565225 |
| USA/CA-CZB-14757/2020 | EPI_ISL_739442 | MZ842391 |
| USA/CA-CZB-14758/2020 | EPI_ISL_738953 | MZ842390 |
| USA/CA-CZB-14759/2020 | EPI_ISL_738832 | MW565224 |
| USA/CA-CZB-14760/2020 | EPI_ISL_739052 | MW565223 |
| USA/CA-CZB-14767/2020 | EPI_ISL_739051 | MW565217 |
| USA/CA-CZB-14768/2020 | EPI_ISL_739272 | MW565216 |
| USA/CA-CZB-14769/2020 | EPI_ISL_738844 | MW565215 |
| USA/CA-CZB-14770/2020 | EPI_ISL_738742 | MW565214 |
| USA/CA-CZB-14771/2020 | EPI_ISL_738852 | MW565213 |
| USA/CA-CZB-14772/2020 | EPI_ISL_739411 | MW565212 |
| USA/CA-CZB-14773/2020 | EPI_ISL_738827 | MW565211 |
| USA/CA-CZB-14774/2020 | EPI_ISL_738600 | MW565210 |
| USA/CA-CZB-14775/2020 | EPI_ISL_739527 | MW565209 |
| USA/CA-CZB-14777/2020 | EPI_ISL_739330 | MW565208 |
| USA/CA-CZB-14778/2020 | EPI_ISL_738912 | MW565207 |
| USA/CA-CZB-14779/2020 | EPI_ISL_738795 | MW565206 |
| USA/CA-CZB-14780/2020 | EPI_ISL_739367 | MW565205 |
| USA/CA-CZB-14781/2020 | EPI_ISL_738759 | MW565204 |
| USA/CA-CZB-14782/2020 | EPI_ISL_738985 | MW565203 |
| USA/CA-CZB-14783/2020 | EPI_ISL_738779 | MW565202 |
| USA/CA-CZB-14784/2020 | EPI_ISL_738810 | MW565201 |

|                       |                 |          |
|-----------------------|-----------------|----------|
| USA/CA-CZB-14785/2020 | EPI_ISL_738913  | MW565200 |
| USA/CA-CZB-14786/2020 | EPI_ISL_739553  | MW565199 |
| USA/CA-CZB-14788/2020 | EPI_ISL_739194  | MW565198 |
| USA/CA-CZB-14789/2020 | EPI_ISL_739621  | MW565197 |
| USA/CA-CZB-14790/2020 | EPI_ISL_739525  | MW565196 |
| USA/CA-CZB-14791/2020 | EPI_ISL_738923  | MW565195 |
| USA/CA-CZB-14792/2020 | EPI_ISL_739032  | MW565194 |
| USA/CA-CZB-14793/2020 | EPI_ISL_739447  | MW565193 |
| USA/CA-CZB-14795/2020 | EPI_ISL_739318  | MW565192 |
| USA/CA-CZB-14796/2020 | EPI_ISL_739542  | MW565191 |
| USA/CA-CZB-14797/2020 | EPI_ISL_739389  | MW565190 |
| USA/CA-CZB-14798/2020 | EPI_ISL_2658662 | NA       |
| USA/CA-CZB-14799/2020 | EPI_ISL_739210  | MW565189 |
| USA/CA-CZB-14801/2020 | EPI_ISL_739043  | MW565188 |
| USA/CA-CZB-14802/2020 | EPI_ISL_738806  | MW565187 |
| USA/CA-CZB-14803/2020 | EPI_ISL_739112  | MW565186 |
| USA/CA-CZB-14804/2020 | EPI_ISL_739611  | MW565185 |
| USA/CA-CZB-14805/2020 | EPI_ISL_738849  | MW565184 |
| USA/CA-CZB-14806/2020 | EPI_ISL_739436  | MW565183 |
| USA/CA-CZB-14807/2020 | EPI_ISL_738902  | MZ842389 |
| USA/CA-CZB-14808/2020 | EPI_ISL_739287  | MW565182 |
| USA/CA-CZB-14809/2020 | EPI_ISL_739313  | MW565181 |
| USA/CA-CZB-14810/2020 | EPI_ISL_739240  | MW565180 |
| USA/CA-CZB-14812/2020 | EPI_ISL_739000  | MW565179 |
| USA/CA-CZB-14813/2020 | EPI_ISL_739228  | MW565178 |
| USA/CA-CZB-14814/2020 | EPI_ISL_739531  | MW565177 |
| USA/CA-CZB-14815/2020 | EPI_ISL_738917  | MW565176 |
| USA/CA-CZB-14816/2020 | EPI_ISL_739170  | MW565175 |
| USA/CA-CZB-14817/2020 | EPI_ISL_739001  | MW565174 |

|                       |                |          |
|-----------------------|----------------|----------|
| USA/CA-CZB-14818/2020 | EPI_ISL_739114 | MW565173 |
| USA/CA-CZB-14819/2020 | EPI_ISL_739007 | MW565172 |
| USA/CA-CZB-14820/2020 | EPI_ISL_739242 | MW565171 |
| USA/CA-CZB-14821/2020 | EPI_ISL_739651 | MW565170 |
| USA/CA-CZB-14822/2020 | EPI_ISL_738504 | MW565169 |
| USA/CA-CZB-14823/2020 | EPI_ISL_738875 | MW565168 |
| USA/CA-CZB-14824/2020 | EPI_ISL_738980 | MW565167 |
| USA/CA-CZB-14825/2020 | EPI_ISL_738865 | MW565166 |
| USA/CA-CZB-14826/2020 | EPI_ISL_739405 | MW565165 |
| USA/CA-CZB-14827/2020 | EPI_ISL_739403 | MW565164 |
| USA/CA-CZB-14828/2020 | EPI_ISL_738938 | MW565163 |
| USA/CA-CZB-14829/2020 | EPI_ISL_738807 | MW565162 |
| USA/CA-CZB-14830/2020 | EPI_ISL_739475 | MW565161 |
| USA/CA-CZB-14831/2020 | EPI_ISL_739417 | MW565160 |
| USA/CA-CZB-14832/2020 | EPI_ISL_739123 | MW565159 |
| USA/CA-CZB-14833/2020 | EPI_ISL_738801 | MW565158 |
| USA/CA-CZB-14834/2020 | EPI_ISL_739274 | MW565157 |
| USA/CA-CZB-14835/2020 | EPI_ISL_738563 | MW565156 |
| USA/CA-CZB-14836/2020 | EPI_ISL_738969 | MZ842388 |
| USA/CA-CZB-14837/2020 | EPI_ISL_739461 | MW565155 |
| USA/CA-CZB-14838/2020 | EPI_ISL_739425 | MW565154 |
| USA/CA-CZB-14839/2020 | EPI_ISL_738651 | MW565153 |
| USA/CA-CZB-14840/2020 | EPI_ISL_738539 | MW565152 |
| USA/CA-CZB-14841/2020 | EPI_ISL_739299 | MW565151 |
| USA/CA-CZB-14842/2020 | EPI_ISL_739183 | MW565150 |
| USA/CA-CZB-14844/2020 | EPI_ISL_739585 | MW565149 |
| USA/CA-CZB-14845/2020 | EPI_ISL_738649 | MW565148 |
| USA/CA-CZB-14846/2020 | EPI_ISL_739106 | MW565147 |
| USA/CA-CZB-14847/2020 | EPI_ISL_738929 | MW565146 |

|                       |                |          |
|-----------------------|----------------|----------|
| USA/CA-CZB-14848/2020 | EPI_ISL_738647 | MW565145 |
| USA/CA-CZB-14849/2020 | EPI_ISL_738999 | MW565144 |
| USA/CA-CZB-14850/2020 | EPI_ISL_738854 | MZ842387 |
| USA/CA-CZB-14851/2020 | EPI_ISL_739452 | MW565143 |
| USA/CA-CZB-14852/2020 | EPI_ISL_739418 | MW565142 |
| USA/CA-CZB-14853/2020 | EPI_ISL_739155 | MW565141 |
| USA/CA-CZB-14854/2020 | EPI_ISL_739126 | MW565140 |
| USA/CA-CZB-14855/2020 | EPI_ISL_738958 | MW565139 |
| USA/CA-CZB-14856/2020 | EPI_ISL_739499 | MW565138 |
| USA/CA-CZB-14857/2020 | EPI_ISL_738809 | MW565137 |
| USA/CA-CZB-14858/2020 | EPI_ISL_738505 | MW565136 |
| USA/CA-CZB-14859/2020 | EPI_ISL_739250 | MW565135 |
| USA/CA-CZB-14860/2020 | EPI_ISL_739608 | MZ842386 |
| USA/CA-CZB-14861/2020 | EPI_ISL_739159 | MW565134 |
| USA/CA-CZB-14862/2020 | EPI_ISL_739198 | MW565133 |
| USA/CA-CZB-14864/2020 | EPI_ISL_739235 | MW565132 |
| USA/CA-CZB-14865/2020 | EPI_ISL_739131 | MW565131 |
| USA/CA-CZB-14866/2020 | EPI_ISL_739269 | MW565130 |
| USA/CA-CZB-1488/2020  | EPI_ISL_468438 | MT628172 |
| USA/CA-CZB-1489/2020  | EPI_ISL_468439 | NA       |
| USA/CA-CZB-1490/2020  | EPI_ISL_468440 | MT628173 |
| USA/CA-CZB-1491/2020  | EPI_ISL_468441 | NA       |
| USA/CA-CZB-1492/2020  | EPI_ISL_468442 | NA       |
| USA/CA-CZB-1493/2020  | EPI_ISL_468443 | NA       |
| USA/CA-CZB-1494/2020  | EPI_ISL_468444 | NA       |
| USA/CA-CZB-1495/2020  | EPI_ISL_468445 | NA       |
| USA/CA-CZB-1497/2020  | EPI_ISL_468446 | MT628174 |
| USA/CA-CZB-1498/2020  | EPI_ISL_468447 | MT628175 |
| USA/CA-CZB-1499/2020  | EPI_ISL_468448 | MT628176 |

|                       |                 |          |
|-----------------------|-----------------|----------|
| USA/CA-CZB-1502/2020  | EPI_ISL_468449  | MT628177 |
| USA/CA-CZB-1503/2020  | EPI_ISL_468450  | MT628178 |
| USA/CA-CZB-1504/2020  | EPI_ISL_468451  | MT628179 |
| USA/CA-CZB-1505/2020  | EPI_ISL_468452  | MT628180 |
| USA/CA-CZB-1506/2020  | EPI_ISL_468453  | MT628181 |
| USA/CA-CZB-1507/2020  | EPI_ISL_468454  | MT628182 |
| USA/CA-CZB-1508/2020  | EPI_ISL_468455  | MT628183 |
| USA/CA-CZB-1509/2020  | EPI_ISL_468456  | MT628184 |
| USA/CA-CZB-1510/2020  | EPI_ISL_468457  | MT628185 |
| USA/CA-CZB-1511/2020  | EPI_ISL_468458  | MT628186 |
| USA/CA-CZB-1512/2020  | EPI_ISL_468459  | MT628187 |
| USA/CA-CZB-1513/2020  | EPI_ISL_468460  | MT628188 |
| USA/CA-CZB-1514/2020  | EPI_ISL_468461  | MT628189 |
| USA/CA-CZB-17317/2020 | EPI_ISL_955496  | MW702500 |
| USA/CA-CZB-17319/2020 | EPI_ISL_955497  | MW702499 |
| USA/CA-CZB-17320/2020 | EPI_ISL_1027535 | MW703127 |
| USA/CA-CZB-17321/2020 | EPI_ISL_955498  | MW702498 |
| USA/CA-CZB-17322/2020 | EPI_ISL_955499  | MW702497 |
| USA/CA-CZB-17323/2020 | EPI_ISL_955500  | MW702496 |
| USA/CA-CZB-17324/2020 | EPI_ISL_955501  | MW702495 |
| USA/CA-CZB-17325/2020 | EPI_ISL_955502  | MW702494 |
| USA/CA-CZB-17326/2020 | EPI_ISL_955503  | MW702493 |
| USA/CA-CZB-17327/2020 | EPI_ISL_955504  | MW702492 |
| USA/CA-CZB-17329/2020 | EPI_ISL_1027536 | MW703126 |
| USA/CA-CZB-17331/2020 | EPI_ISL_955505  | MW702491 |
| USA/CA-CZB-17332/2020 | EPI_ISL_955506  | MW702490 |
| USA/CA-CZB-17333/2020 | EPI_ISL_955507  | MW702489 |
| USA/CA-CZB-17334/2020 | EPI_ISL_955508  | MW702488 |
| USA/CA-CZB-17335/2020 | EPI_ISL_955509  | MW702487 |

|                       |                 |          |
|-----------------------|-----------------|----------|
| USA/CA-CZB-17336/2020 | EPI_ISL_955510  | MW702486 |
| USA/CA-CZB-17337/2020 | EPI_ISL_955511  | MW702485 |
| USA/CA-CZB-17338/2020 | EPI_ISL_955512  | MW702484 |
| USA/CA-CZB-17339/2020 | EPI_ISL_955513  | MW702483 |
| USA/CA-CZB-17340/2020 | EPI_ISL_955514  | MW702482 |
| USA/CA-CZB-17341/2020 | EPI_ISL_1027537 | MW703125 |
| USA/CA-CZB-17342/2020 | EPI_ISL_955515  | MW702481 |
| USA/CA-CZB-17343/2020 | EPI_ISL_955516  | MW702480 |
| USA/CA-CZB-17344/2020 | EPI_ISL_955517  | MW702479 |
| USA/CA-CZB-17345/2020 | EPI_ISL_955518  | MW702478 |
| USA/CA-CZB-17346/2020 | EPI_ISL_955519  | MW702477 |
| USA/CA-CZB-17347/2020 | EPI_ISL_955520  | MW702476 |
| USA/CA-CZB-17348/2020 | EPI_ISL_1027538 | MW703124 |
| USA/CA-CZB-17349/2020 | EPI_ISL_955521  | MW702475 |
| USA/CA-CZB-17350/2020 | EPI_ISL_955522  | MW702474 |
| USA/CA-CZB-17351/2020 | EPI_ISL_955523  | MW702473 |
| USA/CA-CZB-17352/2020 | EPI_ISL_955524  | MW702472 |
| USA/CA-CZB-17353/2020 | EPI_ISL_955525  | MW702471 |
| USA/CA-CZB-17354/2020 | EPI_ISL_2658668 | NA       |
| USA/CA-CZB-17355/2020 | EPI_ISL_955526  | MW702470 |
| USA/CA-CZB-17356/2020 | EPI_ISL_955527  | MW702469 |
| USA/CA-CZB-17357/2020 | EPI_ISL_955528  | MW702468 |
| USA/CA-CZB-17358/2020 | EPI_ISL_955529  | MW702467 |
| USA/CA-CZB-17359/2020 | EPI_ISL_955530  | MW702466 |
| USA/CA-CZB-17360/2020 | EPI_ISL_955531  | MW702465 |
| USA/CA-CZB-17361/2020 | EPI_ISL_955532  | MW702464 |
| USA/CA-CZB-17362/2020 | EPI_ISL_955533  | MW702463 |
| USA/CA-CZB-17363/2020 | EPI_ISL_955534  | MW702462 |
| USA/CA-CZB-17364/2020 | EPI_ISL_955535  | MW702461 |



|                       |                 |          |
|-----------------------|-----------------|----------|
| USA/CA-CZB-17365/2020 | EPI_ISL_955536  | MW702460 |
| USA/CA-CZB-17366/2020 | EPI_ISL_955537  | MW702459 |
| USA/CA-CZB-17367/2020 | EPI_ISL_955538  | MW702458 |
| USA/CA-CZB-17368/2020 | EPI_ISL_955539  | MW702457 |
| USA/CA-CZB-17369/2020 | EPI_ISL_955540  | MW702456 |
| USA/CA-CZB-17370/2020 | EPI_ISL_955541  | MW702455 |
| USA/CA-CZB-17371/2020 | EPI_ISL_2659259 | MW702454 |
| USA/CA-CZB-17372/2020 | EPI_ISL_955542  | MW702453 |
| USA/CA-CZB-17373/2020 | EPI_ISL_2659308 | MW702452 |
| USA/CA-CZB-17374/2020 | EPI_ISL_955543  | MW702451 |
| USA/CA-CZB-17375/2020 | EPI_ISL_955544  | MW702450 |
| USA/CA-CZB-17376/2020 | EPI_ISL_955545  | MW702449 |
| USA/CA-CZB-17377/2020 | EPI_ISL_955546  | MW702448 |
| USA/CA-CZB-17378/2020 | EPI_ISL_955547  | MW702447 |
| USA/CA-CZB-17379/2020 | EPI_ISL_955548  | MW702446 |
| USA/CA-CZB-17380/2020 | EPI_ISL_1027540 | MW703123 |
| USA/CA-CZB-17381/2020 | EPI_ISL_955549  | MW702445 |
| USA/CA-CZB-17382/2020 | EPI_ISL_955550  | MW702444 |
| USA/CA-CZB-17383/2020 | EPI_ISL_955551  | MW702443 |
| USA/CA-CZB-17384/2020 | EPI_ISL_955552  | MW702442 |
| USA/CA-CZB-17385/2020 | EPI_ISL_955553  | MW702441 |
| USA/CA-CZB-17386/2020 | EPI_ISL_955554  | MW702440 |
| USA/CA-CZB-17387/2020 | EPI_ISL_955555  | MW702439 |
| USA/CA-CZB-17388/2020 | EPI_ISL_1027539 | MW703122 |
| USA/CA-CZB-17389/2020 | EPI_ISL_955556  | MW702438 |
| USA/CA-CZB-17390/2020 | EPI_ISL_955557  | MW702437 |
| USA/CA-CZB-17393/2020 | EPI_ISL_1027541 | MW703121 |
| USA/CA-CZB-17394/2020 | EPI_ISL_955558  | NA       |
| USA/CA-CZB-17395/2020 | EPI_ISL_955559  | MW702436 |

|                       |                 |          |
|-----------------------|-----------------|----------|
| USA/CA-CZB-17397/2020 | EPI_ISL_955560  | MW702435 |
| USA/CA-CZB-19111/2020 | EPI_ISL_979710  | MZ842239 |
| USA/CA-CZB-19112/2020 | EPI_ISL_979711  | MW701299 |
| USA/CA-CZB-19113/2020 | EPI_ISL_979712  | MW701298 |
| USA/CA-CZB-19114/2020 | EPI_ISL_979713  | MW701297 |
| USA/CA-CZB-19115/2020 | EPI_ISL_979714  | MW701296 |
| USA/CA-CZB-19116/2020 | EPI_ISL_979715  | MW701295 |
| USA/CA-CZB-19117/2020 | EPI_ISL_979716  | MW701294 |
| USA/CA-CZB-19118/2020 | EPI_ISL_979717  | MW701293 |
| USA/CA-CZB-19119/2020 | EPI_ISL_979718  | MW701292 |
| USA/CA-CZB-19120/2020 | EPI_ISL_2659251 | MW701291 |
| USA/CA-CZB-19121/2020 | EPI_ISL_979719  | MW701290 |
| USA/CA-CZB-19123/2020 | EPI_ISL_2659384 | MW701289 |
| USA/CA-CZB-19124/2020 | EPI_ISL_979720  | MW701288 |
| USA/CA-CZB-19125/2020 | EPI_ISL_979721  | MW701287 |
| USA/CA-CZB-19126/2020 | EPI_ISL_979722  | MW701286 |
| USA/CA-CZB-19127/2020 | EPI_ISL_979723  | MW701285 |
| USA/CA-CZB-19128/2020 | EPI_ISL_979724  | MW701284 |
| USA/CA-CZB-19129/2020 | EPI_ISL_979725  | MW701283 |
| USA/CA-CZB-19132/2020 | EPI_ISL_979726  | MW701282 |
| USA/CA-CZB-19133/2020 | EPI_ISL_979727  | MW701281 |
| USA/CA-CZB-19134/2020 | EPI_ISL_979728  | MW701280 |
| USA/CA-CZB-19135/2020 | EPI_ISL_979729  | MW701279 |
| USA/CA-CZB-19136/2020 | EPI_ISL_979730  | MW701278 |
| USA/CA-CZB-19137/2020 | EPI_ISL_979731  | MW701277 |
| USA/CA-CZB-19138/2020 | EPI_ISL_979732  | MW701276 |
| USA/CA-CZB-19139/2020 | EPI_ISL_979733  | MW701275 |
| USA/CA-CZB-19140/2020 | EPI_ISL_979734  | MW701274 |
| USA/CA-CZB-19141/2020 | EPI_ISL_979735  | MW701273 |

|                       |                |          |
|-----------------------|----------------|----------|
| USA/CA-CZB-19142/2020 | EPI_ISL_979736 | MW701272 |
| USA/CA-CZB-19143/2020 | EPI_ISL_979737 | MW701271 |
| USA/CA-CZB-19144/2020 | EPI_ISL_979738 | MW701270 |
| USA/CA-CZB-19145/2020 | EPI_ISL_979739 | MW701269 |
| USA/CA-CZB-19146/2020 | EPI_ISL_979740 | MW701268 |
| USA/CA-CZB-19147/2020 | EPI_ISL_979741 | MW701267 |
| USA/CA-CZB-19148/2020 | EPI_ISL_979742 | MW701266 |
| USA/CA-CZB-19149/2020 | EPI_ISL_979743 | MW701265 |
| USA/CA-CZB-19150/2020 | EPI_ISL_979744 | MW701264 |
| USA/CA-CZB-19151/2020 | EPI_ISL_979745 | MW701263 |
| USA/CA-CZB-19152/2020 | EPI_ISL_979746 | MW701262 |
| USA/CA-CZB-19153/2020 | EPI_ISL_979747 | MW701261 |
| USA/CA-CZB-19154/2020 | EPI_ISL_979748 | MW701260 |
| USA/CA-CZB-19155/2020 | EPI_ISL_979749 | MW701259 |
| USA/CA-CZB-19156/2020 | EPI_ISL_979750 | MW701258 |
| USA/CA-CZB-19157/2020 | EPI_ISL_979751 | MW701257 |
| USA/CA-CZB-19158/2020 | EPI_ISL_979752 | MW701256 |
| USA/CA-CZB-19159/2020 | EPI_ISL_979753 | MW701255 |
| USA/CA-CZB-19160/2020 | EPI_ISL_979754 | MW701254 |
| USA/CA-CZB-19161/2020 | EPI_ISL_979755 | MW701253 |
| USA/CA-CZB-19162/2020 | EPI_ISL_979756 | MW701252 |
| USA/CA-CZB-19163/2020 | EPI_ISL_979757 | MW701251 |
| USA/CA-CZB-19164/2020 | EPI_ISL_979758 | MW701250 |
| USA/CA-CZB-19165/2020 | EPI_ISL_979759 | MW701249 |
| USA/CA-CZB-19166/2020 | EPI_ISL_979760 | MW701248 |
| USA/CA-CZB-19167/2020 | EPI_ISL_979761 | MW701247 |
| USA/CA-CZB-19168/2020 | EPI_ISL_979762 | MW701246 |
| USA/CA-CZB-19169/2020 | EPI_ISL_979763 | MW701245 |
| USA/CA-CZB-19170/2020 | EPI_ISL_979764 | MW701244 |

|                       |                 |          |
|-----------------------|-----------------|----------|
| USA/CA-CZB-19171/2020 | EPI_ISL_979765  | MW701243 |
| USA/CA-CZB-19172/2020 | EPI_ISL_979766  | MW701242 |
| USA/CA-CZB-19173/2020 | EPI_ISL_979767  | MW701241 |
| USA/CA-CZB-19174/2020 | EPI_ISL_979768  | MW701240 |
| USA/CA-CZB-19175/2020 | EPI_ISL_979769  | MW701239 |
| USA/CA-CZB-19176/2020 | EPI_ISL_979770  | MW701238 |
| USA/CA-CZB-19177/2020 | EPI_ISL_979771  | MW701237 |
| USA/CA-CZB-19178/2020 | EPI_ISL_979772  | MW701236 |
| USA/CA-CZB-19179/2020 | EPI_ISL_979773  | MW701235 |
| USA/CA-CZB-19180/2020 | EPI_ISL_979774  | MW701234 |
| USA/CA-CZB-19181/2020 | EPI_ISL_979775  | MW701233 |
| USA/CA-CZB-19182/2020 | EPI_ISL_979776  | MW701232 |
| USA/CA-CZB-19183/2020 | EPI_ISL_979777  | MW701231 |
| USA/CA-CZB-19184/2020 | EPI_ISL_979778  | MW701230 |
| USA/CA-CZB-19185/2020 | EPI_ISL_979779  | MW701229 |
| USA/CA-CZB-19186/2020 | EPI_ISL_979780  | MW701228 |
| USA/CA-CZB-19187/2020 | EPI_ISL_979781  | MW701227 |
| USA/CA-CZB-19188/2020 | EPI_ISL_979782  | MW701226 |
| USA/CA-CZB-19189/2020 | EPI_ISL_979783  | MW701225 |
| USA/CA-CZB-19190/2020 | EPI_ISL_979784  | MW701224 |
| USA/CA-CZB-19191/2020 | EPI_ISL_2758426 | MZ842238 |
| USA/CA-CZB-19192/2020 | EPI_ISL_979785  | MW701223 |
| USA/CA-CZB-19193/2020 | EPI_ISL_979786  | MW701222 |
| USA/CA-CZB-19194/2020 | EPI_ISL_979787  | MW701221 |
| USA/CA-CZB-19195/2020 | EPI_ISL_979788  | MW701220 |
| USA/CA-CZB-19196/2020 | EPI_ISL_979789  | MW701219 |
| USA/CA-CZB-19197/2020 | EPI_ISL_979790  | MW701218 |
| USA/CA-CZB-19199/2020 | EPI_ISL_979791  | MW701217 |
| USA/CA-CZB-19200/2020 | EPI_ISL_979792  | MW701216 |

|                       |                 |          |
|-----------------------|-----------------|----------|
| USA/CA-CZB-19201/2020 | EPI_ISL_979793  | MW701215 |
| USA/CA-CZB-19202/2020 | EPI_ISL_979794  | MW701214 |
| USA/CA-CZB-19203/2020 | EPI_ISL_979795  | MW701213 |
| USA/CA-CZB-19204/2020 | EPI_ISL_979796  | MW701212 |
| USA/CA-CZB-19205/2020 | EPI_ISL_979797  | MW701211 |
| USA/CA-CZB-19207/2020 | EPI_ISL_979162  | MW700768 |
| USA/CA-CZB-19208/2020 | EPI_ISL_979163  | MW700767 |
| USA/CA-CZB-19209/2020 | EPI_ISL_979164  | MW700766 |
| USA/CA-CZB-19210/2020 | EPI_ISL_979165  | MW700765 |
| USA/CA-CZB-19211/2020 | EPI_ISL_979166  | MW700764 |
| USA/CA-CZB-19212/2020 | EPI_ISL_979167  | MW700763 |
| USA/CA-CZB-19214/2020 | EPI_ISL_979168  | MW700762 |
| USA/CA-CZB-19215/2020 | EPI_ISL_979169  | MW700761 |
| USA/CA-CZB-19216/2020 | EPI_ISL_1030499 | MW702982 |
| USA/CA-CZB-19217/2020 | EPI_ISL_979170  | MW700760 |
| USA/CA-CZB-19218/2020 | EPI_ISL_979171  | MW700759 |
| USA/CA-CZB-19219/2020 | EPI_ISL_979172  | NA       |
| USA/CA-CZB-19220/2020 | EPI_ISL_979173  | MW700758 |
| USA/CA-CZB-19221/2020 | EPI_ISL_979174  | MW700757 |
| USA/CA-CZB-19222/2020 | EPI_ISL_979175  | MW700756 |
| USA/CA-CZB-19223/2020 | EPI_ISL_979176  | MW700755 |
| USA/CA-CZB-19224/2020 | EPI_ISL_979177  | MW700754 |
| USA/CA-CZB-19225/2020 | EPI_ISL_979178  | MW700753 |
| USA/CA-CZB-19227/2020 | EPI_ISL_979179  | MW700752 |
| USA/CA-CZB-19228/2020 | EPI_ISL_979180  | MW700751 |
| USA/CA-CZB-19229/2020 | EPI_ISL_979181  | MW700750 |
| USA/CA-CZB-19230/2020 | EPI_ISL_979182  | MW700749 |
| USA/CA-CZB-19232/2020 | EPI_ISL_979183  | MW700748 |
| USA/CA-CZB-19233/2020 | EPI_ISL_979184  | MW700747 |

|                       |                 |          |
|-----------------------|-----------------|----------|
| USA/CA-CZB-19235/2020 | EPI_ISL_979185  | MW700746 |
| USA/CA-CZB-19236/2020 | EPI_ISL_979186  | MW700745 |
| USA/CA-CZB-19237/2020 | EPI_ISL_979187  | MW700744 |
| USA/CA-CZB-19238/2020 | EPI_ISL_979188  | MW700743 |
| USA/CA-CZB-19239/2020 | EPI_ISL_979189  | MW700742 |
| USA/CA-CZB-19240/2020 | EPI_ISL_979190  | MW700741 |
| USA/CA-CZB-19241/2020 | EPI_ISL_979191  | MW700740 |
| USA/CA-CZB-19242/2020 | EPI_ISL_979192  | MW700739 |
| USA/CA-CZB-19243/2020 | EPI_ISL_979193  | MW700738 |
| USA/CA-CZB-19244/2020 | EPI_ISL_979194  | MW700737 |
| USA/CA-CZB-19246/2020 | EPI_ISL_979195  | MW700736 |
| USA/CA-CZB-19247/2020 | EPI_ISL_979196  | MW700735 |
| USA/CA-CZB-19248/2020 | EPI_ISL_979197  | MW700734 |
| USA/CA-CZB-19249/2020 | EPI_ISL_979198  | MW700733 |
| USA/CA-CZB-19250/2020 | EPI_ISL_979199  | MW700732 |
| USA/CA-CZB-19251/2020 | EPI_ISL_979200  | MW700731 |
| USA/CA-CZB-19252/2020 | EPI_ISL_979201  | MW700730 |
| USA/CA-CZB-19253/2020 | EPI_ISL_979202  | MW700729 |
| USA/CA-CZB-19254/2020 | EPI_ISL_979203  | MW700728 |
| USA/CA-CZB-19255/2020 | EPI_ISL_979204  | MW700727 |
| USA/CA-CZB-19256/2020 | EPI_ISL_979205  | MW700726 |
| USA/CA-CZB-19257/2020 | EPI_ISL_979206  | MW700725 |
| USA/CA-CZB-19258/2020 | EPI_ISL_979207  | MZ842237 |
| USA/CA-CZB-19259/2020 | EPI_ISL_979208  | MW700724 |
| USA/CA-CZB-19261/2020 | EPI_ISL_979209  | MW700723 |
| USA/CA-CZB-19262/2020 | EPI_ISL_979210  | MW700722 |
| USA/CA-CZB-19263/2020 | EPI_ISL_2658604 | NA       |
| USA/CA-CZB-19265/2020 | EPI_ISL_979211  | MW700721 |
| USA/CA-CZB-19266/2020 | EPI_ISL_979212  | MW700720 |

|                       |                |          |
|-----------------------|----------------|----------|
| USA/CA-CZB-19267/2020 | EPI_ISL_979213 | MW700719 |
| USA/CA-CZB-19268/2020 | EPI_ISL_979214 | MW700718 |
| USA/CA-CZB-19269/2020 | EPI_ISL_979215 | MW700717 |
| USA/CA-CZB-19271/2020 | EPI_ISL_979216 | MW700716 |
| USA/CA-CZB-19272/2020 | EPI_ISL_979217 | MW700715 |
| USA/CA-CZB-19273/2020 | EPI_ISL_979218 | MW700714 |
| USA/CA-CZB-19274/2020 | EPI_ISL_979219 | MW700713 |
| USA/CA-CZB-19275/2020 | EPI_ISL_979220 | MW700712 |
| USA/CA-CZB-19276/2020 | EPI_ISL_979221 | MW700711 |
| USA/CA-CZB-19277/2020 | EPI_ISL_979222 | MW700710 |
| USA/CA-CZB-19278/2020 | EPI_ISL_979223 | MW700709 |
| USA/CA-CZB-19279/2020 | EPI_ISL_979224 | MW700708 |
| USA/CA-CZB-19280/2020 | EPI_ISL_979225 | MW700707 |
| USA/CA-CZB-19281/2020 | EPI_ISL_979226 | MW700706 |
| USA/CA-CZB-19282/2020 | EPI_ISL_979227 | MW700705 |
| USA/CA-CZB-19283/2020 | EPI_ISL_979228 | MW700704 |
| USA/CA-CZB-19284/2020 | EPI_ISL_979229 | MW700703 |
| USA/CA-CZB-19285/2020 | EPI_ISL_979230 | MW700702 |
| USA/CA-CZB-19286/2020 | EPI_ISL_979231 | MW700701 |
| USA/CA-CZB-19287/2020 | EPI_ISL_979232 | MZ842236 |
| USA/CA-CZB-19288/2020 | EPI_ISL_979233 | MZ842235 |
| USA/CA-CZB-19289/2020 | EPI_ISL_979234 | MW700700 |
| USA/CA-CZB-19290/2020 | EPI_ISL_979235 | MW700699 |
| USA/CA-CZB-19291/2020 | EPI_ISL_979236 | MW700698 |
| USA/CA-CZB-19292/2020 | EPI_ISL_979237 | MW700697 |
| USA/CA-CZB-19293/2020 | EPI_ISL_979238 | MW700696 |
| USA/CA-CZB-19294/2020 | EPI_ISL_979239 | MW700695 |
| USA/CA-CZB-19295/2020 | EPI_ISL_979240 | MW700694 |
| USA/CA-CZB-19296/2020 | EPI_ISL_979241 | MW700693 |

|                       |                 |          |
|-----------------------|-----------------|----------|
| USA/CA-CZB-19297/2020 | EPI_ISL_979242  | MW700692 |
| USA/CA-CZB-19298/2020 | EPI_ISL_979243  | MW700691 |
| USA/CA-CZB-19299/2020 | EPI_ISL_979244  | MW700690 |
| USA/CA-CZB-19301/2020 | EPI_ISL_979245  | MW700689 |
| USA/CA-CZB-19302/2020 | EPI_ISL_955693  | MW700467 |
| USA/CA-CZB-19303/2020 | EPI_ISL_2758427 | MZ842234 |
| USA/CA-CZB-19304/2020 | EPI_ISL_955694  | MW700466 |
| USA/CA-CZB-19305/2020 | EPI_ISL_955695  | MW700465 |
| USA/CA-CZB-19306/2020 | EPI_ISL_955696  | MW700464 |
| USA/CA-CZB-19307/2020 | EPI_ISL_955697  | MW700463 |
| USA/CA-CZB-19308/2020 | EPI_ISL_955698  | MW700462 |
| USA/CA-CZB-19309/2020 | EPI_ISL_955699  | MW700461 |
| USA/CA-CZB-19310/2020 | EPI_ISL_955700  | MW700460 |
| USA/CA-CZB-19311/2020 | EPI_ISL_955701  | MW700459 |
| USA/CA-CZB-19312/2020 | EPI_ISL_955702  | MW700458 |
| USA/CA-CZB-19313/2020 | EPI_ISL_955703  | MW700457 |
| USA/CA-CZB-19314/2020 | EPI_ISL_955704  | MW700456 |
| USA/CA-CZB-19315/2020 | EPI_ISL_955705  | MW700455 |
| USA/CA-CZB-19316/2020 | EPI_ISL_955706  | MW700454 |
| USA/CA-CZB-19317/2020 | EPI_ISL_955707  | MW700453 |
| USA/CA-CZB-19318/2020 | EPI_ISL_955708  | MW700452 |
| USA/CA-CZB-19319/2020 | EPI_ISL_955709  | MW700451 |
| USA/CA-CZB-19320/2020 | EPI_ISL_955710  | MW700450 |
| USA/CA-CZB-19321/2020 | EPI_ISL_955711  | MW700449 |
| USA/CA-CZB-19322/2020 | EPI_ISL_955712  | MW700448 |
| USA/CA-CZB-19323/2020 | EPI_ISL_955713  | MW700447 |
| USA/CA-CZB-19324/2020 | EPI_ISL_955714  | MW700446 |
| USA/CA-CZB-19325/2020 | EPI_ISL_955715  | MW700445 |
| USA/CA-CZB-19326/2020 | EPI_ISL_955716  | MW700444 |



|                       |                 |          |
|-----------------------|-----------------|----------|
| USA/CA-CZB-19327/2020 | EPI_ISL_955717  | MW700443 |
| USA/CA-CZB-19328/2020 | EPI_ISL_955718  | MW700442 |
| USA/CA-CZB-19329/2020 | EPI_ISL_955719  | MW700441 |
| USA/CA-CZB-19330/2020 | EPI_ISL_955720  | MW700440 |
| USA/CA-CZB-19331/2020 | EPI_ISL_955721  | MW700439 |
| USA/CA-CZB-19332/2020 | EPI_ISL_955722  | MW700438 |
| USA/CA-CZB-19333/2020 | EPI_ISL_955723  | MW700437 |
| USA/CA-CZB-19334/2020 | EPI_ISL_1027561 | MW703037 |
| USA/CA-CZB-19335/2020 | EPI_ISL_2659213 | MW700436 |
| USA/CA-CZB-19336/2020 | EPI_ISL_955724  | MW700435 |
| USA/CA-CZB-19338/2020 | EPI_ISL_955725  | MW700434 |
| USA/CA-CZB-19339/2020 | EPI_ISL_955726  | MW700433 |
| USA/CA-CZB-19340/2020 | EPI_ISL_955727  | MW700432 |
| USA/CA-CZB-19341/2020 | EPI_ISL_2758428 | MZ842233 |
| USA/CA-CZB-19342/2020 | EPI_ISL_955728  | MW700431 |
| USA/CA-CZB-19343/2020 | EPI_ISL_955729  | MW700430 |
| USA/CA-CZB-19344/2020 | EPI_ISL_955730  | MW700429 |
| USA/CA-CZB-19345/2020 | EPI_ISL_2659635 | MW700428 |
| USA/CA-CZB-19346/2020 | EPI_ISL_955731  | MW700427 |
| USA/CA-CZB-19347/2020 | EPI_ISL_955732  | MW700426 |
| USA/CA-CZB-19348/2020 | EPI_ISL_955733  | MW700425 |
| USA/CA-CZB-19349/2020 | EPI_ISL_955734  | MW700424 |
| USA/CA-CZB-19350/2020 | EPI_ISL_955735  | MW700423 |
| USA/CA-CZB-19351/2020 | EPI_ISL_955736  | MW700422 |
| USA/CA-CZB-19352/2020 | EPI_ISL_955737  | MW700421 |
| USA/CA-CZB-19353/2020 | EPI_ISL_955738  | MW700420 |
| USA/CA-CZB-19354/2020 | EPI_ISL_955739  | MW700419 |
| USA/CA-CZB-19355/2020 | EPI_ISL_955740  | MW700418 |
| USA/CA-CZB-19356/2020 | EPI_ISL_955741  | MW700417 |

|                       |                 |          |
|-----------------------|-----------------|----------|
| USA/CA-CZB-19357/2020 | EPI_ISL_955742  | MW700416 |
| USA/CA-CZB-19358/2020 | EPI_ISL_955743  | MW700415 |
| USA/CA-CZB-19359/2020 | EPI_ISL_955744  | MW700414 |
| USA/CA-CZB-19360/2020 | EPI_ISL_955745  | MW700413 |
| USA/CA-CZB-19361/2020 | EPI_ISL_955746  | MW700412 |
| USA/CA-CZB-19362/2020 | EPI_ISL_955747  | MW700411 |
| USA/CA-CZB-19363/2020 | EPI_ISL_955748  | MW700410 |
| USA/CA-CZB-19364/2020 | EPI_ISL_955749  | MW700409 |
| USA/CA-CZB-19365/2020 | EPI_ISL_955750  | MZ842232 |
| USA/CA-CZB-19366/2020 | EPI_ISL_955751  | MW700408 |
| USA/CA-CZB-19367/2020 | EPI_ISL_955752  | MW700407 |
| USA/CA-CZB-19368/2020 | EPI_ISL_955753  | MW700406 |
| USA/CA-CZB-19369/2020 | EPI_ISL_2658710 | NA       |
| USA/CA-CZB-19371/2020 | EPI_ISL_955754  | MW700405 |
| USA/CA-CZB-19372/2020 | EPI_ISL_955755  | MW700404 |
| USA/CA-CZB-19373/2020 | EPI_ISL_955756  | MW700403 |
| USA/CA-CZB-19374/2020 | EPI_ISL_955757  | MW700402 |
| USA/CA-CZB-19375/2020 | EPI_ISL_955758  | MW700401 |
| USA/CA-CZB-19376/2020 | EPI_ISL_955759  | MW700400 |
| USA/CA-CZB-19377/2020 | EPI_ISL_955760  | MW700399 |
| USA/CA-CZB-19378/2020 | EPI_ISL_955761  | MW700398 |
| USA/CA-CZB-19379/2020 | EPI_ISL_955762  | MW700397 |
| USA/CA-CZB-19380/2020 | EPI_ISL_955763  | MW700396 |
| USA/CA-CZB-19381/2021 | EPI_ISL_955764  | MW700395 |
| USA/CA-CZB-19382/2020 | EPI_ISL_955765  | MW700394 |
| USA/CA-CZB-19383/2020 | EPI_ISL_955766  | MW700393 |
| USA/CA-CZB-19384/2021 | EPI_ISL_955767  | MW700392 |
| USA/CA-CZB-19385/2021 | EPI_ISL_955768  | MW700391 |
| USA/CA-CZB-19387/2021 | EPI_ISL_955769  | MW700390 |

|                       |                 |          |
|-----------------------|-----------------|----------|
| USA/CA-CZB-19388/2021 | EPI_ISL_955770  | MW700389 |
| USA/CA-CZB-19389/2021 | EPI_ISL_955771  | MW700388 |
| USA/CA-CZB-19390/2021 | EPI_ISL_955772  | MW700387 |
| USA/CA-CZB-19391/2021 | EPI_ISL_955773  | MW700386 |
| USA/CA-CZB-19392/2021 | EPI_ISL_955774  | MW700385 |
| USA/CA-CZB-19393/2021 | EPI_ISL_1027476 | MW703036 |
| USA/CA-CZB-19394/2021 | EPI_ISL_955775  | MW700384 |
| USA/CA-CZB-19395/2021 | EPI_ISL_955776  | MW700383 |
| USA/CA-CZB-19396/2021 | EPI_ISL_1027517 | MW703035 |
| USA/CA-CZB-19397/2021 | EPI_ISL_955777  | MW700382 |
| USA/CA-CZB-2033/2020  | EPI_ISL_1924619 | MZ842848 |
| USA/CA-CZB-2034/2020  | EPI_ISL_486280  | MT750454 |
| USA/CA-CZB-2035/2020  | EPI_ISL_486281  | MZ842847 |
| USA/CA-CZB-2036/2020  | EPI_ISL_486282  | MT750455 |
| USA/CA-CZB-2037/2020  | EPI_ISL_486283  | MT750456 |
| USA/CA-CZB-2039/2020  | EPI_ISL_486284  | MZ842846 |
| USA/CA-CZB-2041/2020  | EPI_ISL_486285  | MT750457 |
| USA/CA-CZB-2042/2020  | EPI_ISL_486286  | MT750458 |
| USA/CA-CZB-23111/2021 | EPI_ISL_1185409 | MW739359 |
| USA/CA-CZB-23112/2021 | EPI_ISL_1185355 | MW739358 |
| USA/CA-CZB-23113/2021 | EPI_ISL_1185438 | MW739357 |
| USA/CA-CZB-23115/2021 | EPI_ISL_1185428 | MW739356 |
| USA/CA-CZB-23116/2021 | EPI_ISL_1185294 | MW739355 |
| USA/CA-CZB-23117/2021 | EPI_ISL_1185302 | MW739354 |
| USA/CA-CZB-23118/2021 | EPI_ISL_1185528 | MW739353 |
| USA/CA-CZB-23119/2021 | EPI_ISL_1185359 | MW739352 |
| USA/CA-CZB-23120/2021 | EPI_ISL_1185489 | MW739351 |
| USA/CA-CZB-23122/2021 | EPI_ISL_1185361 | MW739350 |
| USA/CA-CZB-23123/2021 | EPI_ISL_1185408 | MW739349 |

|                       |                 |          |
|-----------------------|-----------------|----------|
| USA/CA-CZB-23124/2021 | EPI_ISL_1185497 | MW739348 |
| USA/CA-CZB-23125/2021 | EPI_ISL_1185448 | MW739347 |
| USA/CA-CZB-23126/2021 | EPI_ISL_1185505 | MW739346 |
| USA/CA-CZB-23127/2021 | EPI_ISL_1185382 | MW739345 |
| USA/CA-CZB-23128/2021 | EPI_ISL_1185385 | MW739344 |
| USA/CA-CZB-23129/2021 | EPI_ISL_1185319 | MW739343 |
| USA/CA-CZB-23130/2021 | EPI_ISL_1185318 | MW739342 |
| USA/CA-CZB-23131/2021 | EPI_ISL_1185325 | MW739341 |
| USA/CA-CZB-23132/2021 | EPI_ISL_1185395 | MW739340 |
| USA/CA-CZB-23133/2021 | EPI_ISL_1185304 | MW739339 |
| USA/CA-CZB-23134/2021 | EPI_ISL_1185345 | MW739338 |
| USA/CA-CZB-23135/2021 | EPI_ISL_1185455 | MW739337 |
| USA/CA-CZB-23136/2021 | EPI_ISL_1185352 | MW739336 |
| USA/CA-CZB-23137/2021 | EPI_ISL_1185399 | MW739335 |
| USA/CA-CZB-23138/2021 | EPI_ISL_1185298 | MW739334 |
| USA/CA-CZB-23139/2021 | EPI_ISL_2659557 | MW739333 |
| USA/CA-CZB-23140/2021 | EPI_ISL_1185460 | MZ842204 |
| USA/CA-CZB-23141/2021 | EPI_ISL_1185369 | MW739332 |
| USA/CA-CZB-23142/2021 | EPI_ISL_1185488 | MW739331 |
| USA/CA-CZB-23143/2021 | EPI_ISL_1185326 | MW739330 |
| USA/CA-CZB-23144/2021 | EPI_ISL_1185468 | MW739329 |
| USA/CA-CZB-23145/2021 | EPI_ISL_2659338 | MW739328 |
| USA/CA-CZB-23146/2021 | EPI_ISL_1185312 | MW739327 |
| USA/CA-CZB-23147/2021 | EPI_ISL_1185471 | MW739326 |
| USA/CA-CZB-23148/2021 | EPI_ISL_1185309 | MW739325 |
| USA/CA-CZB-23149/2021 | EPI_ISL_1185300 | MW739324 |
| USA/CA-CZB-23150/2021 | EPI_ISL_1185301 | MW739323 |
| USA/CA-CZB-23151/2021 | EPI_ISL_1185292 | MW739322 |
| USA/CA-CZB-23152/2021 | EPI_ISL_2659380 | MW739321 |

|                       |                 |          |
|-----------------------|-----------------|----------|
| USA/CA-CZB-23153/2021 | EPI_ISL_2659359 | MW739320 |
| USA/CA-CZB-23155/2021 | EPI_ISL_2659316 | MW739319 |
| USA/CA-CZB-23156/2021 | EPI_ISL_1185474 | MW739318 |
| USA/CA-CZB-23157/2021 | EPI_ISL_1185365 | MW739317 |
| USA/CA-CZB-23158/2021 | EPI_ISL_1185454 | MW739316 |
| USA/CA-CZB-23159/2021 | EPI_ISL_1185394 | MW739315 |
| USA/CA-CZB-23161/2021 | EPI_ISL_1185509 | MW739314 |
| USA/CA-CZB-23162/2021 | EPI_ISL_1185436 | MW739313 |
| USA/CA-CZB-23163/2021 | EPI_ISL_1185407 | MW739312 |
| USA/CA-CZB-23164/2021 | EPI_ISL_1185308 | MW739311 |
| USA/CA-CZB-23165/2021 | EPI_ISL_1185346 | MW739310 |
| USA/CA-CZB-23166/2021 | EPI_ISL_1185507 | MW739309 |
| USA/CA-CZB-23167/2021 | EPI_ISL_1185417 | MW739308 |
| USA/CA-CZB-23168/2021 | EPI_ISL_2659319 | MW739307 |
| USA/CA-CZB-23169/2021 | EPI_ISL_2659336 | MW739306 |
| USA/CA-CZB-23170/2021 | EPI_ISL_2659609 | MW739305 |
| USA/CA-CZB-23171/2021 | EPI_ISL_1185526 | MW739304 |
| USA/CA-CZB-23172/2021 | EPI_ISL_1185360 | MW739303 |
| USA/CA-CZB-23173/2021 | EPI_ISL_1185287 | MW739302 |
| USA/CA-CZB-23174/2021 | EPI_ISL_1185476 | MW739301 |
| USA/CA-CZB-23175/2021 | EPI_ISL_1185440 | MW739300 |
| USA/CA-CZB-23177/2021 | EPI_ISL_1185329 | MW739299 |
| USA/CA-CZB-23178/2021 | EPI_ISL_1185424 | MW739298 |
| USA/CA-CZB-23179/2021 | EPI_ISL_1185291 | MW739297 |
| USA/CA-CZB-23180/2021 | EPI_ISL_1185479 | MW739296 |
| USA/CA-CZB-23181/2021 | EPI_ISL_1185481 | MW739295 |
| USA/CA-CZB-23182/2021 | EPI_ISL_1185469 | MW739294 |
| USA/CA-CZB-23183/2021 | EPI_ISL_1185323 | MW739293 |
| USA/CA-CZB-23184/2021 | EPI_ISL_1185353 | MW739292 |

|                       |                 |          |
|-----------------------|-----------------|----------|
| USA/CA-CZB-23185/2021 | EPI_ISL_1185519 | MW739291 |
| USA/CA-CZB-23186/2021 | EPI_ISL_1185521 | MW739290 |
| USA/CA-CZB-23187/2021 | EPI_ISL_1185328 | MW739289 |
| USA/CA-CZB-23188/2021 | EPI_ISL_1185504 | MW739288 |
| USA/CA-CZB-23189/2021 | EPI_ISL_1185413 | MW739287 |
| USA/CA-CZB-23190/2021 | EPI_ISL_1185410 | MW739286 |
| USA/CA-CZB-23191/2021 | EPI_ISL_2659421 | MW739285 |
| USA/CA-CZB-23192/2021 | EPI_ISL_1185340 | MW739284 |
| USA/CA-CZB-23193/2021 | EPI_ISL_1185498 | MW739283 |
| USA/CA-CZB-23194/2021 | EPI_ISL_1185425 | MW739282 |
| USA/CA-CZB-23195/2021 | EPI_ISL_1185324 | MZ842203 |
| USA/CA-CZB-23196/2021 | EPI_ISL_1185516 | MW739281 |
| USA/CA-CZB-23198/2021 | EPI_ISL_1185432 | MW739280 |
| USA/CA-CZB-23199/2021 | EPI_ISL_1185518 | MW739279 |
| USA/CA-CZB-23200/2021 | EPI_ISL_1185486 | MW739278 |
| USA/CA-CZB-23201/2021 | EPI_ISL_1185487 | MW739277 |
| USA/CA-CZB-23202/2021 | EPI_ISL_1185463 | MW739276 |
| USA/CA-CZB-23203/2021 | EPI_ISL_1185306 | MW739275 |
| USA/CA-CZB-23204/2021 | EPI_ISL_1185439 | MW739274 |
| USA/CA-CZB-23205/2021 | EPI_ISL_2659265 | MW739273 |
| USA/CA-CZB-23206/2021 | EPI_ISL_1185412 | MW739272 |
| USA/CA-CZB-2419/2020  | EPI_ISL_513840  | MZ842842 |
| USA/CA-CZB-2420/2020  | EPI_ISL_513841  | MW035992 |
| USA/CA-CZB-2421/2020  | EPI_ISL_513842  | MW035999 |
| USA/CA-CZB-2422/2020  | EPI_ISL_513843  | MW036022 |
| USA/CA-CZB-2423/2020  | EPI_ISL_513844  | MW036010 |
| USA/CA-CZB-2424/2020  | EPI_ISL_513845  | MW035997 |
| USA/CA-CZB-2425/2020  | EPI_ISL_513846  | MW036024 |
| USA/CA-CZB-2426/2020  | EPI_ISL_513847  | MW036047 |

|                       |                 |          |
|-----------------------|-----------------|----------|
| USA/CA-CZB-2429/2020  | EPI_ISL_513848  | MW036038 |
| USA/CA-CZB-2430/2020  | EPI_ISL_513849  | MW035991 |
| USA/CA-CZB-2431/2020  | EPI_ISL_513850  | MW036084 |
| USA/CA-CZB-2433/2020  | EPI_ISL_513851  | NA       |
| USA/CA-CZB-2436/2020  | EPI_ISL_513852  | MW036056 |
| USA/CA-CZB-2443/2020  | EPI_ISL_513853  | MW036090 |
| USA/CA-CZB-2445/2020  | EPI_ISL_513854  | MW036003 |
| USA/CA-CZB-2446/2020  | EPI_ISL_513855  | MW036073 |
| USA/CA-CZB-25659/2021 | EPI_ISL_1234789 | MW739803 |
| USA/CA-CZB-25660/2021 | EPI_ISL_1234794 | MW739802 |
| USA/CA-CZB-25661/2021 | EPI_ISL_1234799 | MW739801 |
| USA/CA-CZB-25662/2021 | EPI_ISL_1235011 | MW739800 |
| USA/CA-CZB-25663/2021 | EPI_ISL_1234833 | MW739799 |
| USA/CA-CZB-25664/2021 | EPI_ISL_1234871 | MW739798 |
| USA/CA-CZB-25665/2021 | EPI_ISL_2658600 | NA       |
| USA/CA-CZB-25666/2021 | EPI_ISL_1234807 | MW739797 |
| USA/CA-CZB-25667/2021 | EPI_ISL_1234930 | MW739796 |
| USA/CA-CZB-25668/2021 | EPI_ISL_1234826 | MW739795 |
| USA/CA-CZB-25669/2021 | EPI_ISL_1234831 | MW739794 |
| USA/CA-CZB-25670/2021 | EPI_ISL_1234793 | MW739793 |
| USA/CA-CZB-25671/2021 | EPI_ISL_1235012 | MW739792 |
| USA/CA-CZB-25672/2021 | EPI_ISL_1235023 | MW739791 |
| USA/CA-CZB-25674/2021 | EPI_ISL_1234955 | MW739790 |
| USA/CA-CZB-25675/2021 | EPI_ISL_1234949 | MW739789 |
| USA/CA-CZB-25676/2021 | EPI_ISL_1234836 | MW739788 |
| USA/CA-CZB-25678/2021 | EPI_ISL_1235002 | MW739787 |
| USA/CA-CZB-25679/2021 | EPI_ISL_1234908 | MW739786 |
| USA/CA-CZB-25680/2021 | EPI_ISL_1235030 | MW739785 |
| USA/CA-CZB-25681/2021 | EPI_ISL_1235046 | MW739784 |

|                       |                 |          |
|-----------------------|-----------------|----------|
| USA/CA-CZB-25682/2021 | EPI_ISL_1234788 | MW739783 |
| USA/CA-CZB-25683/2021 | EPI_ISL_1235004 | MW739782 |
| USA/CA-CZB-25684/2021 | EPI_ISL_2658582 | NA       |
| USA/CA-CZB-25685/2021 | EPI_ISL_1234896 | MW739781 |
| USA/CA-CZB-25686/2021 | EPI_ISL_1234898 | MW739780 |
| USA/CA-CZB-25687/2021 | EPI_ISL_1234922 | MW739779 |
| USA/CA-CZB-25688/2021 | EPI_ISL_1234852 | MW739778 |
| USA/CA-CZB-25689/2021 | EPI_ISL_1235039 | MW739777 |
| USA/CA-CZB-25690/2021 | EPI_ISL_1234927 | MW739776 |
| USA/CA-CZB-25691/2021 | EPI_ISL_1235037 | MW739775 |
| USA/CA-CZB-25692/2021 | EPI_ISL_1235003 | MW739774 |
| USA/CA-CZB-25693/2021 | EPI_ISL_1234859 | MW739773 |
| USA/CA-CZB-25694/2021 | EPI_ISL_1234998 | MW739772 |
| USA/CA-CZB-25695/2021 | EPI_ISL_1234948 | MW739771 |
| USA/CA-CZB-25696/2021 | EPI_ISL_1234889 | MW739770 |
| USA/CA-CZB-25697/2021 | EPI_ISL_1234823 | MW739769 |
| USA/CA-CZB-25698/2021 | EPI_ISL_1234981 | MW739768 |
| USA/CA-CZB-25699/2021 | EPI_ISL_1234960 | MW739767 |
| USA/CA-CZB-25701/2021 | EPI_ISL_1234882 | MW739766 |
| USA/CA-CZB-25702/2021 | EPI_ISL_1234868 | MW739765 |
| USA/CA-CZB-25703/2021 | EPI_ISL_1234989 | MW739764 |
| USA/CA-CZB-25704/2021 | EPI_ISL_1235001 | MW739763 |
| USA/CA-CZB-25707/2021 | EPI_ISL_1235005 | MW739762 |
| USA/CA-CZB-25708/2021 | EPI_ISL_2758452 | MZ842102 |
| USA/CA-CZB-25709/2021 | EPI_ISL_1235040 | MW739761 |
| USA/CA-CZB-25710/2021 | EPI_ISL_1234824 | MW739760 |
| USA/CA-CZB-25711/2021 | EPI_ISL_1234861 | MW739759 |
| USA/CA-CZB-25712/2021 | EPI_ISL_1234971 | MW739758 |
| USA/CA-CZB-25713/2021 | EPI_ISL_1234801 | MW739757 |



|                       |                 |          |
|-----------------------|-----------------|----------|
| USA/CA-CZB-25714/2021 | EPI_ISL_1234903 | MW739756 |
| USA/CA-CZB-25715/2021 | EPI_ISL_1234910 | MW739755 |
| USA/CA-CZB-25716/2021 | EPI_ISL_1234853 | MW739754 |
| USA/CA-CZB-25718/2021 | EPI_ISL_1234811 | MW739753 |
| USA/CA-CZB-25719/2021 | EPI_ISL_1234934 | MW739752 |
| USA/CA-CZB-25720/2021 | EPI_ISL_1234912 | MW739751 |
| USA/CA-CZB-25721/2021 | EPI_ISL_1234814 | MW739750 |
| USA/CA-CZB-25722/2021 | EPI_ISL_1235033 | MW739749 |
| USA/CA-CZB-25723/2021 | EPI_ISL_1234911 | MW739748 |
| USA/CA-CZB-25724/2021 | EPI_ISL_1234803 | MW739747 |
| USA/CA-CZB-25725/2021 | EPI_ISL_1234874 | MW739746 |
| USA/CA-CZB-25726/2021 | EPI_ISL_2658646 | NA       |
| USA/CA-CZB-25727/2021 | EPI_ISL_1234936 | MW739745 |
| USA/CA-CZB-25728/2021 | EPI_ISL_1234916 | MW739744 |
| USA/CA-CZB-25729/2021 | EPI_ISL_1234822 | MW739743 |
| USA/CA-CZB-25730/2021 | EPI_ISL_1234980 | MW739742 |
| USA/CA-CZB-25731/2021 | EPI_ISL_1234805 | MW739741 |
| USA/CA-CZB-25732/2021 | EPI_ISL_1234786 | MW739740 |
| USA/CA-CZB-25733/2021 | EPI_ISL_1234817 | MW739739 |
| USA/CA-CZB-25734/2021 | EPI_ISL_1234906 | MW739738 |
| USA/CA-CZB-25735/2021 | EPI_ISL_1234816 | MW739737 |
| USA/CA-CZB-25736/2021 | EPI_ISL_1234863 | MW739736 |
| USA/CA-CZB-25737/2021 | EPI_ISL_1234890 | MW739735 |
| USA/CA-CZB-25738/2021 | EPI_ISL_1235045 | MW739734 |
| USA/CA-CZB-25739/2021 | EPI_ISL_1234821 | MW739733 |
| USA/CA-CZB-25740/2021 | EPI_ISL_1234931 | MW739732 |
| USA/CA-CZB-25741/2021 | EPI_ISL_1235053 | MW739731 |
| USA/CA-CZB-25742/2021 | EPI_ISL_1234928 | MW739730 |
| USA/CA-CZB-25743/2021 | EPI_ISL_1234888 | MW739729 |

|                       |                 |          |
|-----------------------|-----------------|----------|
| USA/CA-CZB-25744/2021 | EPI_ISL_1234893 | MW739728 |
| USA/CA-CZB-25745/2021 | EPI_ISL_1234984 | MW739727 |
| USA/CA-CZB-25746/2021 | EPI_ISL_1234914 | MW739726 |
| USA/CA-CZB-25747/2021 | EPI_ISL_1234905 | MW739725 |
| USA/CA-CZB-25748/2021 | EPI_ISL_2758453 | MZ842101 |
| USA/CA-CZB-25749/2021 | EPI_ISL_1234792 | MW739724 |
| USA/CA-CZB-25750/2021 | EPI_ISL_1234966 | MW739723 |
| USA/CA-CZB-25751/2021 | EPI_ISL_1234963 | MW739722 |
| USA/CA-CZB-25752/2021 | EPI_ISL_1234856 | MW739721 |
| USA/CA-CZB-25753/2021 | EPI_ISL_2659310 | MZ842100 |
| USA/CA-CZB-25754/2021 | EPI_ISL_1234974 | MW739720 |
